# Supplementary material for: A versatile core–shell hetero-nanostructure catalysed chemo-selective synthesis of β-enamino carbonyl compounds
Source: Royal Society of Chemistry journal article supplement (doi:10.1039/d3su00073g), 2023-01-01
Supplement: d3su00073g1.pdf [file d3su00073g1.pdf]

### Supporting information

#### **A versatile core-shell hetero nanostructure catalyzed chemo-selective synthesis of $\beta$ -enamino carbonyl compounds**

Sriparna Dutta,<sup>a,b</sup> Prashant Kumar,<sup>c</sup> Shivani Sharma,<sup>a,d</sup> Sneha Yadav,<sup>a</sup> Priyanka,<sup>a</sup> Ranjana Dixit,<sup>a,d</sup> Anju Srivastava,<sup>a,b</sup> Rakesh Kumar Sharma<sup>a\*</sup>

<sup>a</sup>Green Chemistry Network Centre, Department of Chemistry, University of Delhi, Delhi-110007, India

<sup>b</sup>Hindu College, University of Delhi, Delhi- 110007, India

<sup>c</sup>Department of Chemistry, SRM University Delhi-NCR Sonapat Haryana-131029, India

<sup>d</sup>Department of Chemistry, Ramjas College, University of Delhi, Delhi- 110007, India

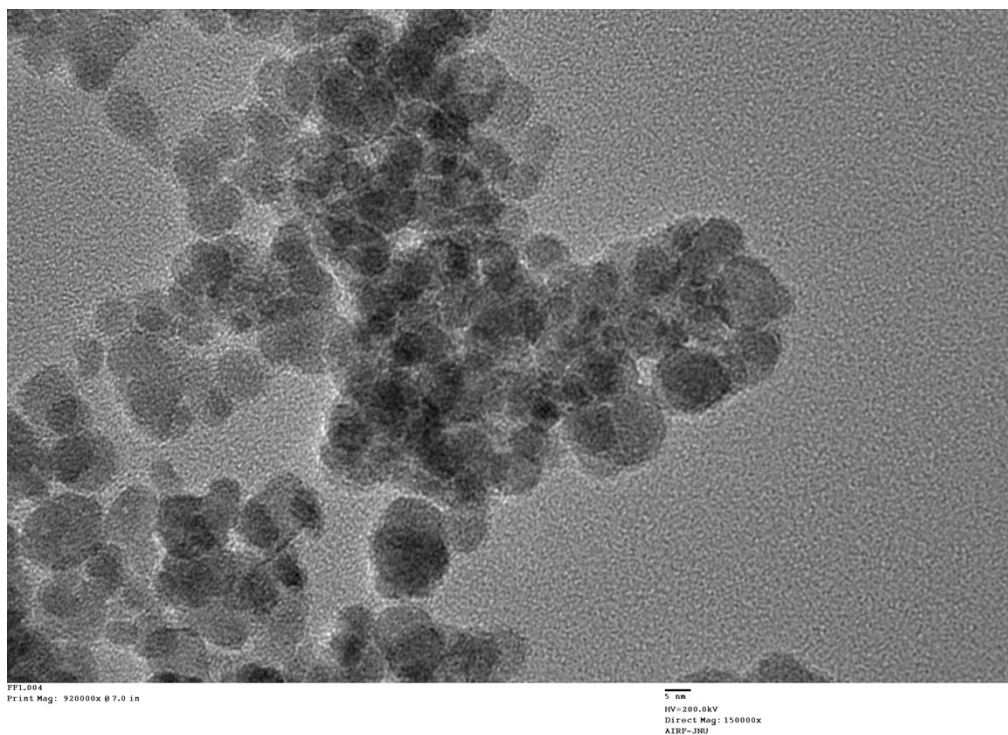

**Figure S1:** TEM image of silica coated magnetite nanoparticles

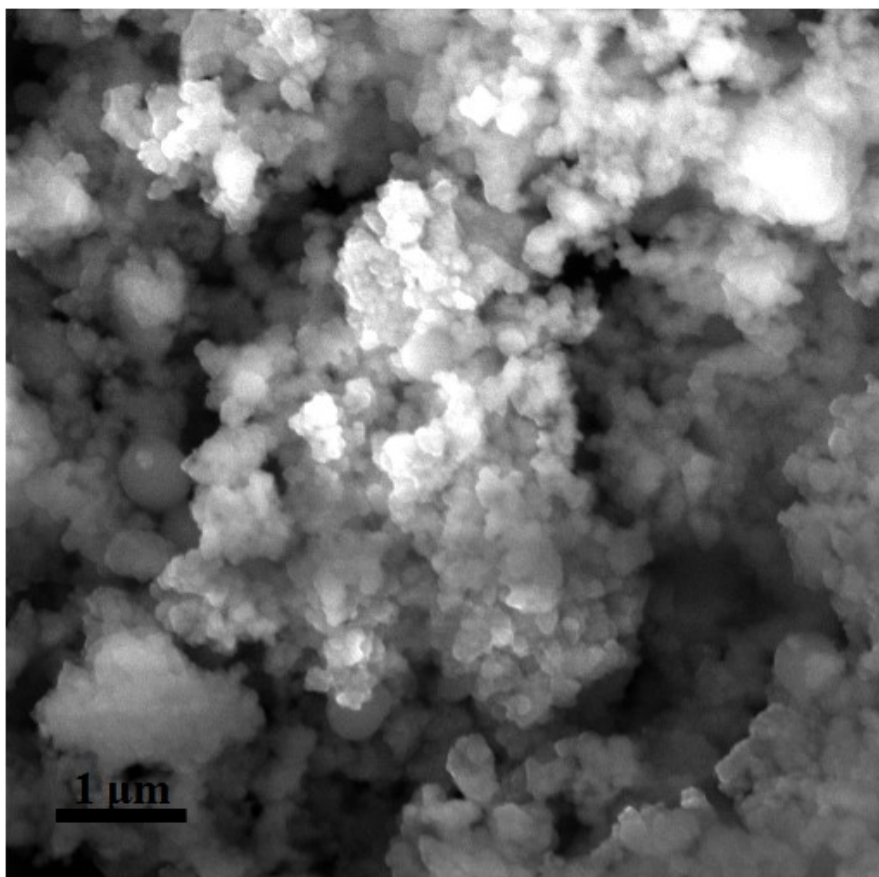

**Figure S2:** SEM Image of recovered catalyst.

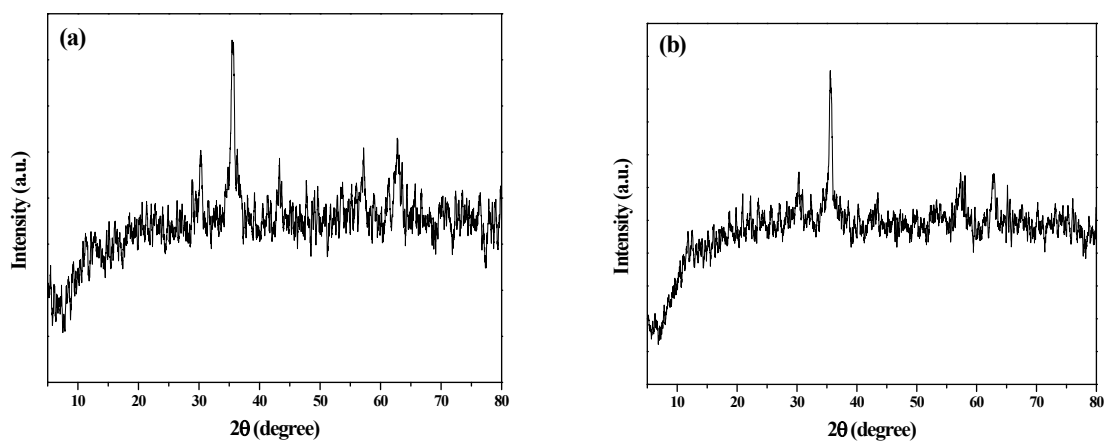

**Figure S3:** XRD Spectrum of (a) Fresh and (b) Recovered catalyst

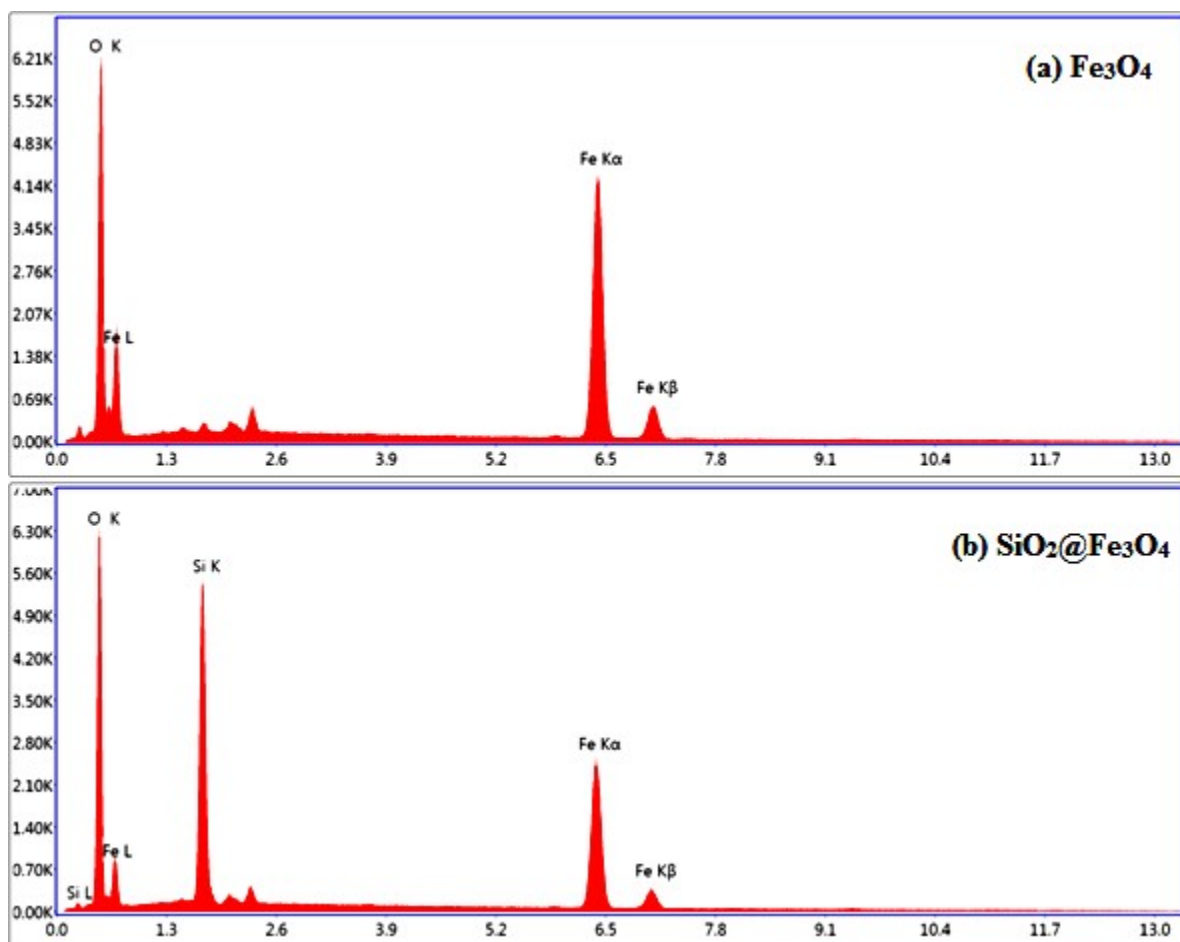

**Figure S4:** EDX spectra of a)  $\text{Fe}_3\text{O}_4$  and b)  $\text{SiO}_2@\text{Fe}_3\text{O}_4$  nanoparticles.

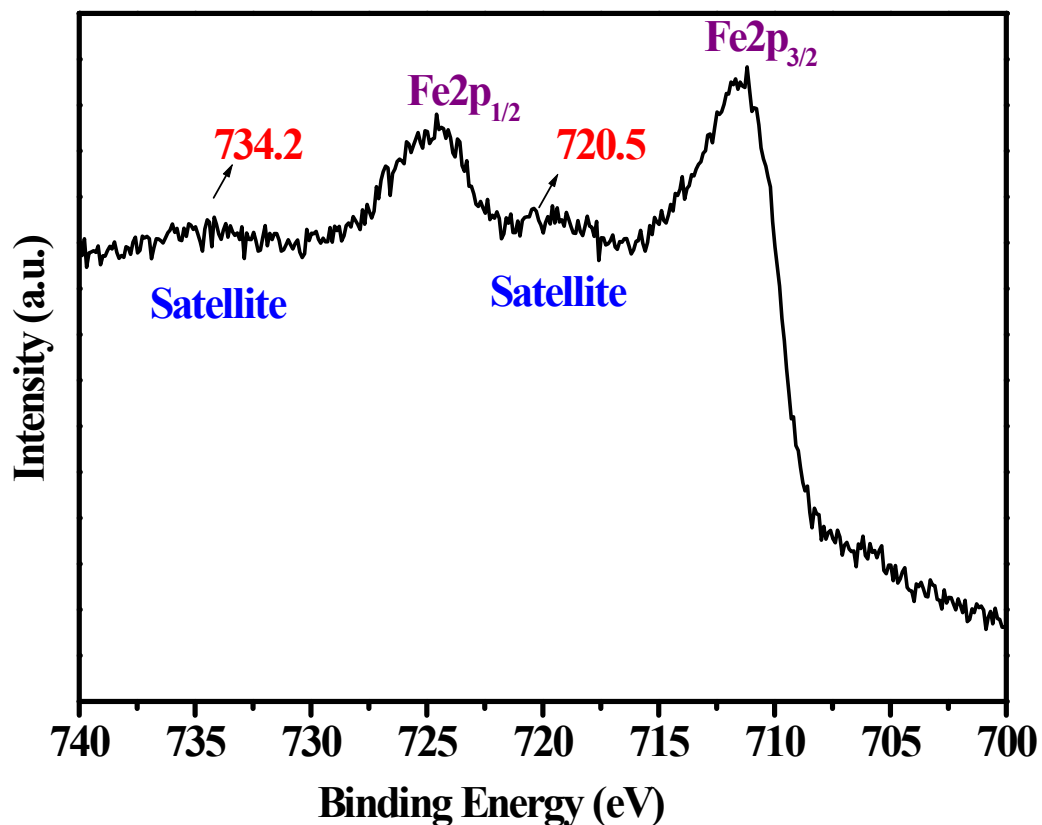

Figure S5: XPS Spectrum of Fe2p of catalyst.

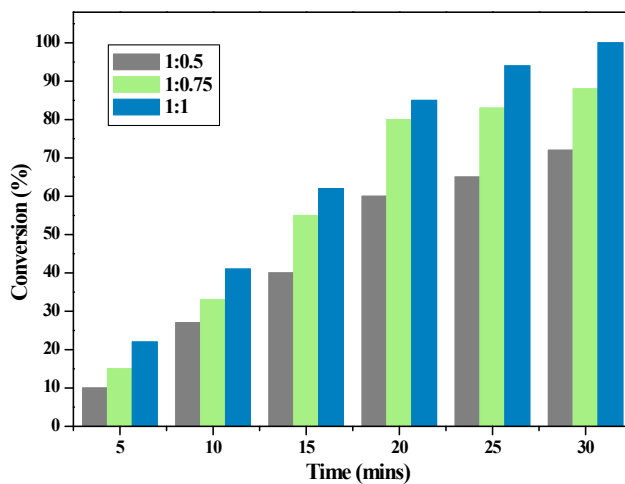

Figure S6: Effect of substrate molar ratio for the enamination reaction [Reaction conditions: benzylamine (a mmol), methylacetoacetate (b mmol), Co-NQ@Am-SiO<sub>2</sub>@Fe<sub>3</sub>O<sub>4</sub> (20 mg), solvent free conditions, r.t. (25 °C)].

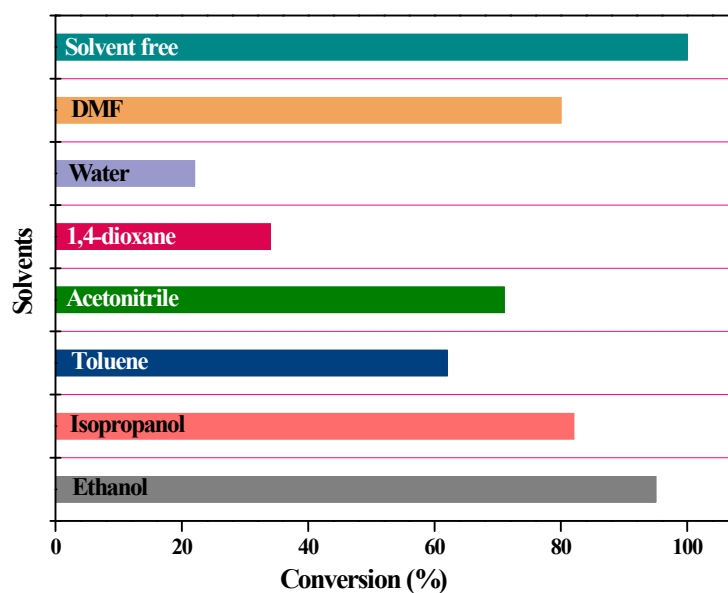

**Figure S7:** Effect of solvent on the enamination reaction [Reaction Conditions: benzylamine (1 mmol), methylacetoacetate (1 mmol), Co-NQ@Am-SiO<sub>2</sub>@Fe<sub>3</sub>O<sub>4</sub> catalyst (20 mg), solvent (2 mL), stirring at r.t. (25 °C)]

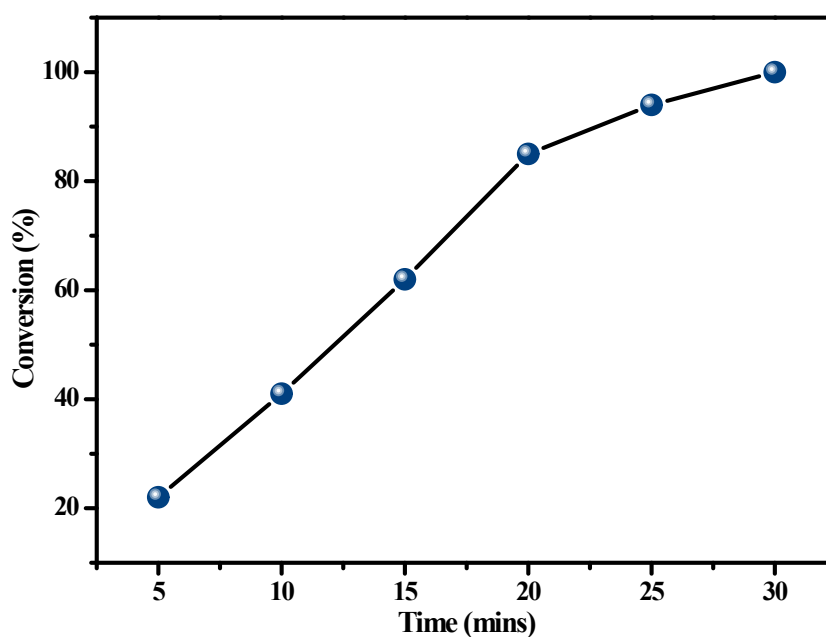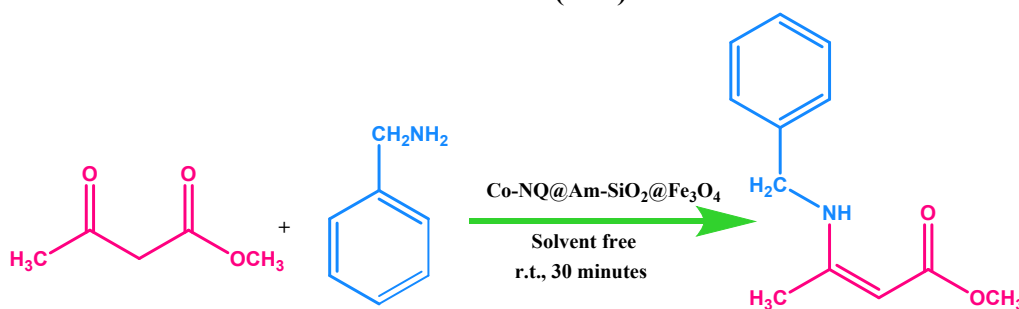

**Figure S8:** Effect of time on Co-NQ@Am-SiO<sub>2</sub>@Fe<sub>3</sub>O<sub>4</sub> catalyzed enamination reaction [Reaction conditions: benzylamine (1 mmol), methylacetoacetate (1 mmol), Co-NQ@Am-SiO<sub>2</sub>@Fe<sub>3</sub>O<sub>4</sub> catalyst (20 mg), stirring at r.t. (25 °C)].

**Table S1:** Effect of temperature on the Co-NQ@Am-SiO<sub>2</sub>@Fe<sub>3</sub>O<sub>4</sub> catalyzed enamination reaction.

| Entry | Temperature | Conversion (%) |
|-------|-------------|----------------|
| 1.    | 25          | 100            |
| 2.    | 35          | 98             |
| 3.    | 45          | 94             |
| 4.    | 55          | 92             |
| 5.    | 65          | 89             |

[Reaction Conditions: Benzylamine (1 mmol), Methylacetoacetate (1 mmol), Co-NQ@Am-SiO<sub>2</sub>@Fe<sub>3</sub>O<sub>4</sub> catalyst (20 mg), stirring].
